# Supplementary material for: Chitosan-based carbon nanoparticles as a heavy metal indicator and for wastewater treatment
Source: Royal Society of Chemistry journal article supplement (doi:10.1039/d1ra00692d), 2021-01-01
Supplement: d1ra00692d1.pdf [file d1ra00692d1.pdf]

## Supporting information

### Chitosan-Based Carbon Nanoparticles for Heavy Metal Indicator and for Wastewater Treatment

Panyong Wang<sup>1,2</sup>, Li Li<sup>2\*</sup>, Xinpei Pang<sup>1,2</sup>, Yan Zhang<sup>2</sup>, Yang Zhang<sup>2</sup>, Wen-Fei Dong<sup>2</sup>, and  
Ruhong Yan<sup>3\*</sup>

<sup>1</sup> School of Biomedical Engineering (Suzhou), Division of Life Sciences and Medicine,  
University of Science and Technology of China, Hefei 230026, China;

<sup>2</sup> CAS Key Laboratory of Biomedical Diagnostics, Suzhou Institute of Biomedical  
Engineering and Technology, Chinese Academy of Science (CAS), Suzhou 215163, China;

<sup>3</sup> The Affiliated Suzhou Science & Technology Town Hospital of Nanjing Medical  
University, Suzhou 215153, China;

\* Correspondence: yrhzl@hotmail.com (R. Yan), lil@sibet.ac.cn (L. Li).

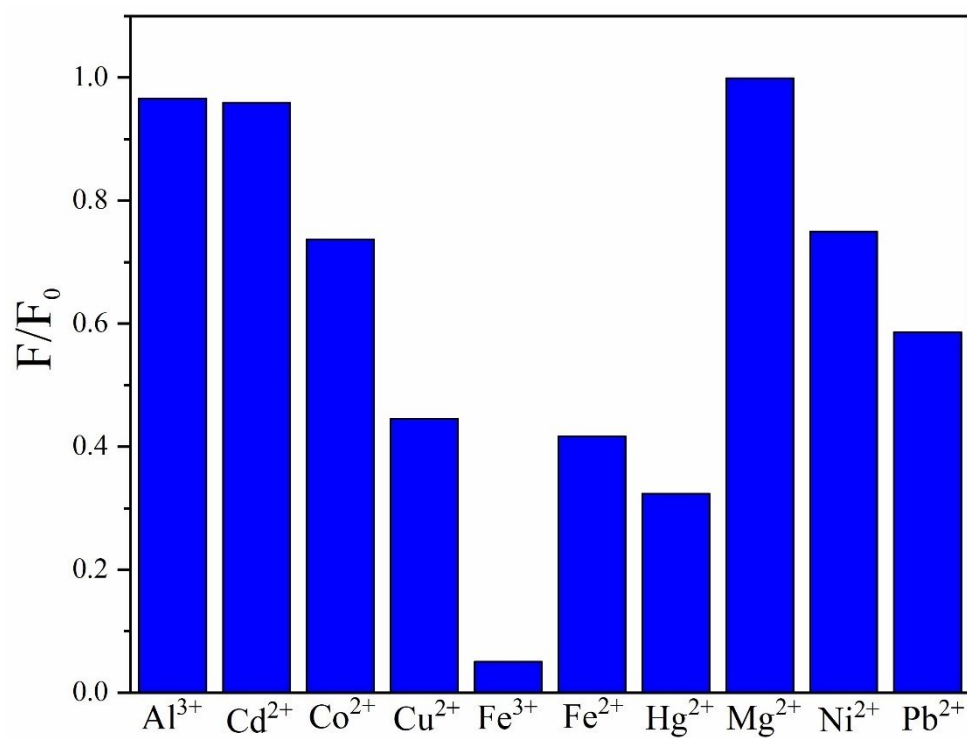

**Figure S1.** Fluorescence quenching of chi-CNPs after addition of various metal ions.

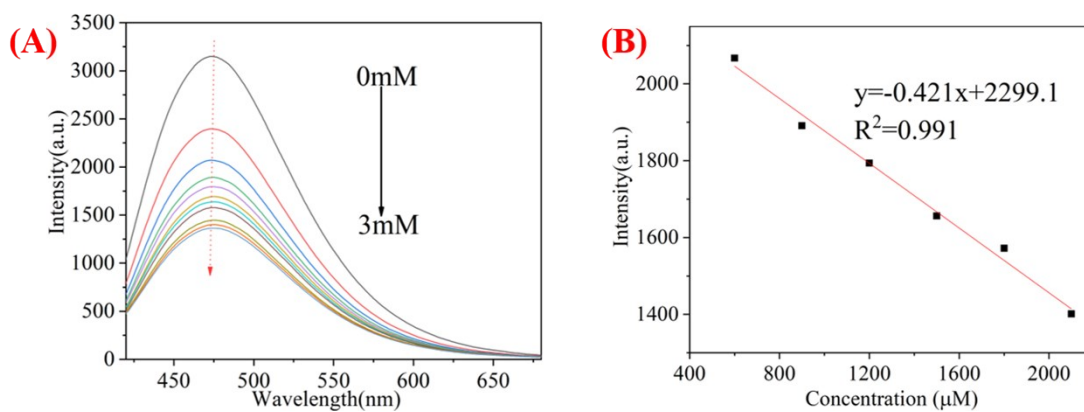

**Figure S2.** (A) Fluorescence quenching curve of chi-CNPs with copper ion (0 ~ 3 mM); (B) The correlation between chi-CNPs fluorescence intensity and  $\text{Cu}^{2+}$  at the various concentrations of 0.6 ~ 2.1 mM.

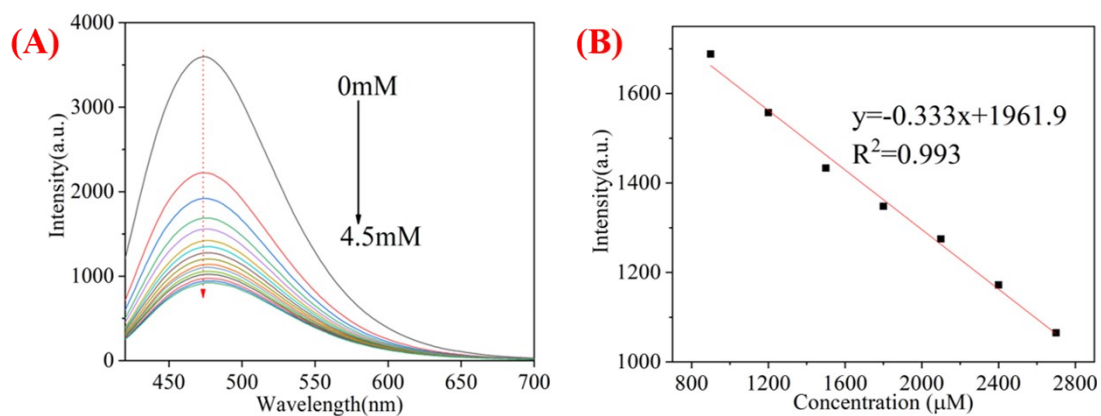

**Figure S3.** (A) Fluorescence quenching curve of chi-CNPs with ferrous ion (0 ~ 4.5 mM). (B) The correlation between chi-CNPs fluorescence intensity and  $\text{Fe}^{2+}$  at the various concentrations of 0.9 ~ 2.7 mM.

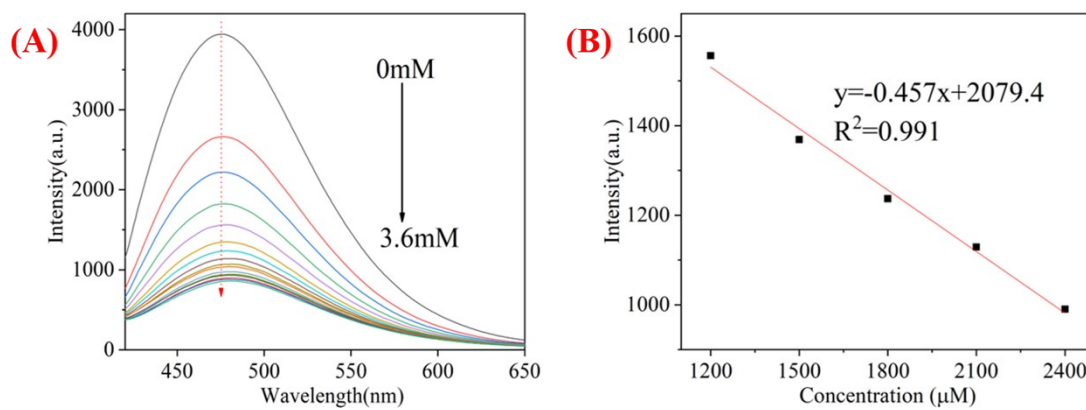

**Figure S4.** (A) Fluorescence quenching curve of chi-CNPs with mercury ion (0 ~ 3.6 mM); (B) The correlation between chi-CNPs fluorescence intensity and Hg<sup>2+</sup> at the various concentrations of 1.2 ~ 2.4 mM.

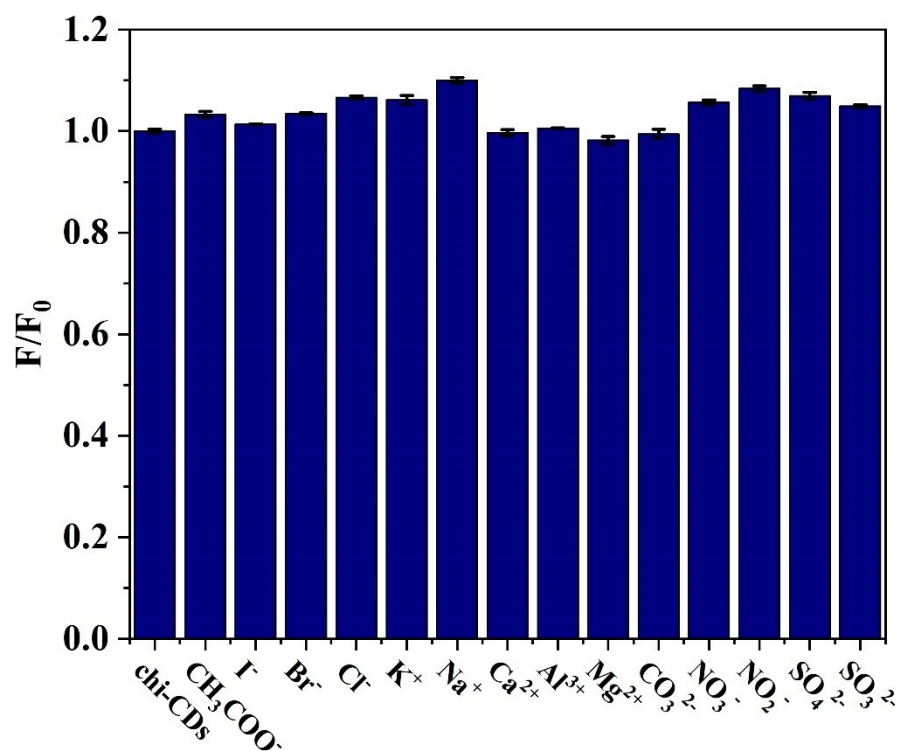

**Figure S5.** Fluorescence intensity ratios ( $F/F_0$ ) of various ions to the chi-CNDs. The concentration of  $\text{Na}^+$ ,  $\text{K}^+$ ,  $\text{Ca}^{2+}$ ,  $\text{Al}^{3+}$ ,  $\text{Mg}^{2+}$ ,  $\text{CO}_3^{2-}$ ,  $\text{Cl}^-$ ,  $\text{Br}^-$ ,  $\text{I}^-$ ,  $\text{NO}_3^-$ ,  $\text{NO}_2^-$ ,  $\text{SO}_3^{2-}$ ,  $\text{SO}_4^{2-}$  and  $\text{CH}_3\text{COO}^-$  was  $500\mu\text{M}$ .

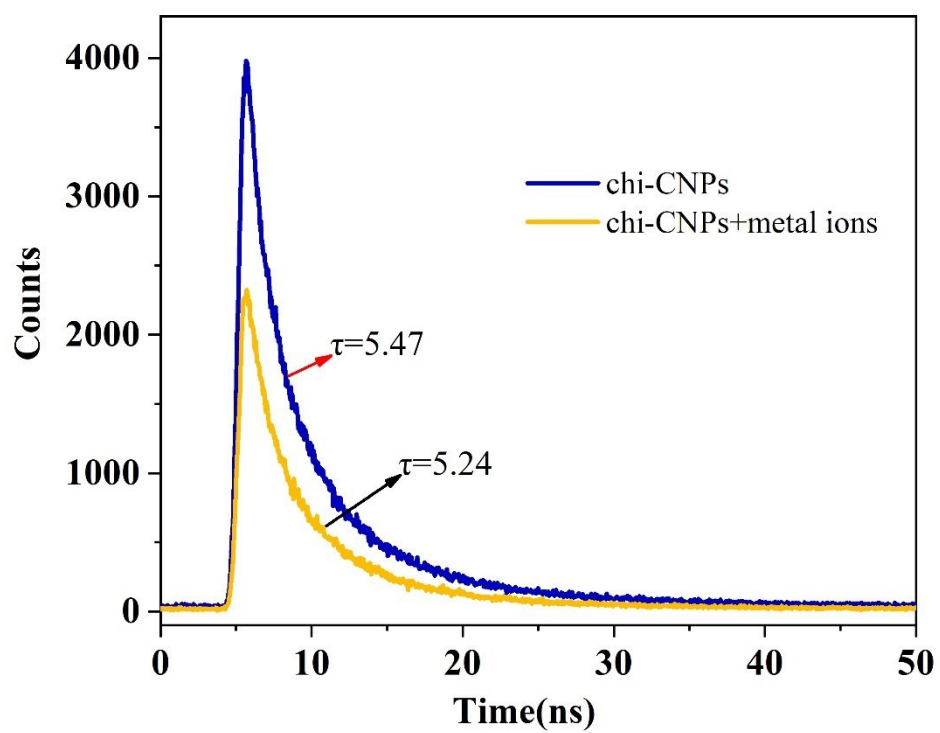

**Figure S6.** Fluorescence lifetime of the chi-CNPs before and after the addition of metal ions.
